# Supplementary material for: Real-World Heart Failure Burden in Thai Patients
Source: Springer Nature journal article supplement (doi:10.1007/s40119-024-00355-8), 2024-02-07
Supplement: MOESM1 [file 26710516]

# Real-World Heart Failure Burden in Thai Patients

## *Supplementary material*

**Panyapat Jiampo MD<sup>1</sup>, Thidaporn Tangkittikasem MD<sup>2</sup>, Thanita Boonyapiphat MD<sup>3</sup>, Vichai Senthong MD<sup>4</sup>, Artit Torpongpun MD<sup>5</sup>**

<sup>1</sup>Bhumibol Adulyadej Hospital, Sai Mai District, Bangkok, Thailand

<sup>2</sup>Udon Thani Hospital, Mueang, Udon Thani, Thailand

<sup>3</sup>Lampang Hospital, Mueang, Lampang, Thailand

<sup>4</sup>Queen Sirikit Heart Center of the Northeast, Khon Kaen University, Mueang, Khon Kaen, Thailand

<sup>5</sup>Chonburi Hospital, Mueang, Chonburi, Thailand

**Correspondence author:** Artit Torpongpun, MD, t.artit@hotmail.com

69 Moo 2, Sukhumvit Road, Ban Suan, Mueang Chon Buri, Chon Buri, Thailand 20000

### **Contents:**

*The list of local Institutional Review Board (IRB) of participating hospitals. .... 2*

***The list of local Institutional Review Board (IRB) of participating hospitals.***

- 1) Medical Research and Invention Center Bhumibol Adulyadej Hospital: COA No. 43/65
- 2) Institutional Review Board Udonthani Hospital: UDH Rec No.26/2565
- 3) Center for Ethics in Human Research, Khon Kaen University: HE651108
- 4) Institutional Review Board of Chonburi Hospital: 98/64/P/q
- 5) Ethics Committee for Human Research of Lampang Hospital: 131/64
